# Supplementary figures and images for: Supplementation of Nicotinic Acid and Its Derivatives Up-Regulates Cellular NAD+ Level Rather than Nicotinamide Derivatives in Cultured Normal Human Epidermal Keratinocytes
Source: MDPI journal article supplement (doi:10.3390/life14030413), 2024-03-20

# Original Blots

SOD2

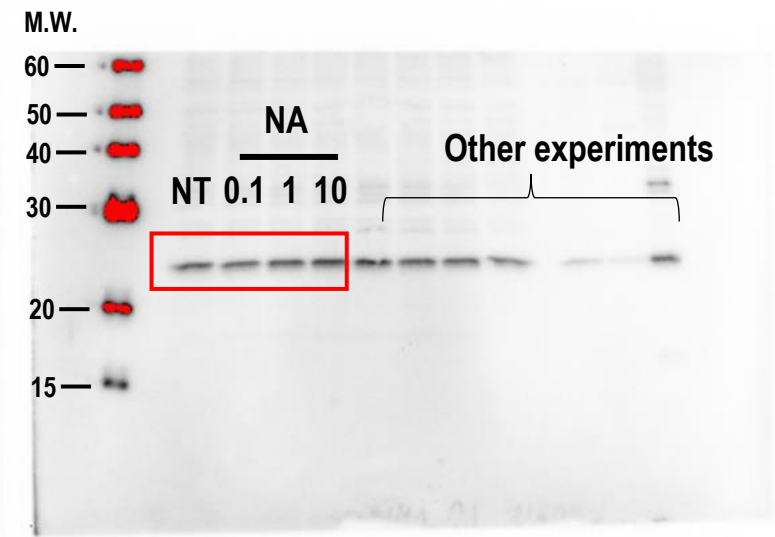

SIRT3

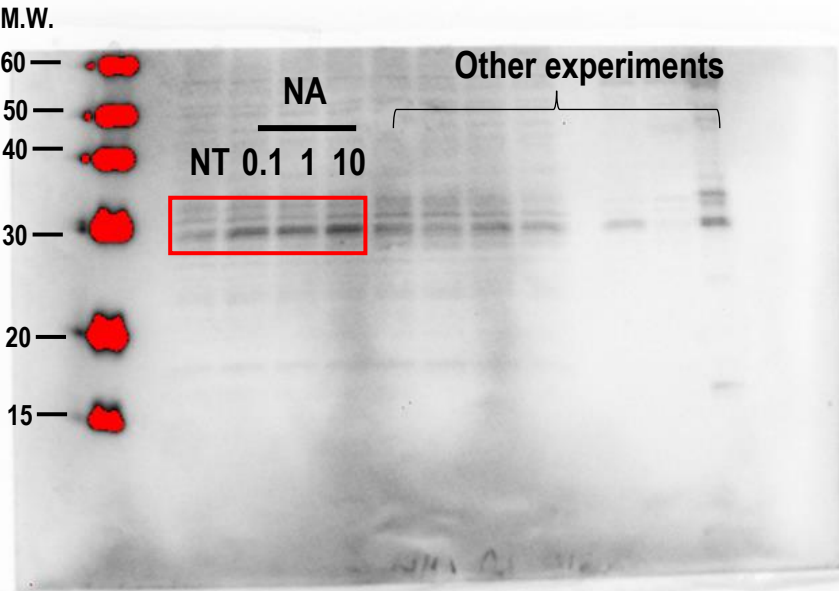

GAPDH

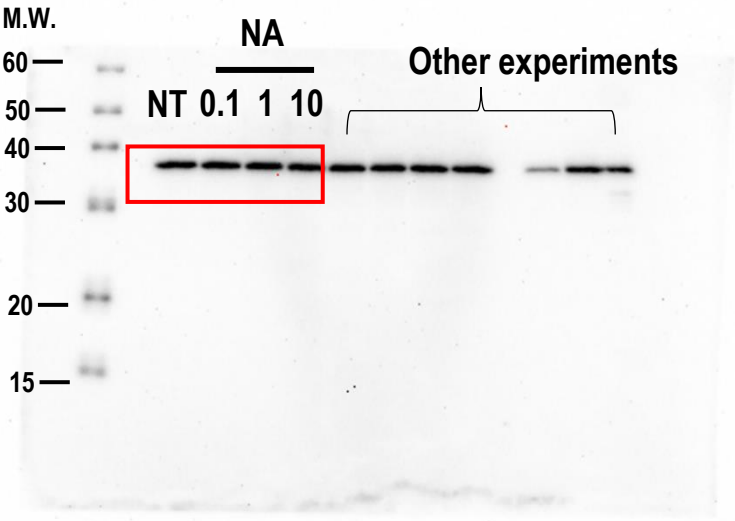

Supplement: s1 [file s1]
